# Supplementary material for: Cooperative Binding of SRSF3 to Structured 3’ss-α Exon RNA during α Exon Inclusion in the ZO-1 mRNA
Source: MDPI journal article supplement (doi:10.3390/cimb45010039), 2023-01-09
Supplement: s1 [file s1]

Supplementary Figure S1. Oligonucleotides and its use in this study.

| USE                  | Primer name/sequence 5'-3'                       |
|----------------------|--------------------------------------------------|
| Transcription        | 44-(GTTGATGATGCTGGGTTTG)                         |
|                      | 5αT7(TAATACGACTCACTATAGGGGAAGTTAGCAATAAAGAGAAGC) |
|                      | Antisense α (CTTCTGCTTTCTGTGAAGTG)               |
|                      | Anti-αC (TCTGCTTTCTGTGAAGTG)                     |
| RT PCR               | C3 (ATGAAGACACAGATACAGAAGGCGGG)                  |
|                      | B3 (TCATAGCGTGGTCTGCTGTCATAGGAC)                 |
|                      | Act1 (TCACGCACGATTTCCCTCTCAG)                    |
|                      | Act2 (ATTTGGCACCACACTTTCTACA)                    |
|                      | BG1 (CAACTTCATCCACGTTCCACC)                      |
|                      | BG2 (GAAGAGCCAAGGACAGGTAC)                       |
| Directed mutagenesis | sM1 (TTTTAAACCGGGCACAGAAAGCAGAAGCCTCATCTCCAG)    |
|                      | aM1 (CTGGAGAT GAGGCTTCTGCTTTCTGTGCCCGGTTTAAAA)   |
|                      | sM2 (CACTTCACAGAAAGCTGGGTCCTCAT CTCCAG)          |
|                      | aM2 (CTGGAGATGAGGACCCAGCTTTCTGTGAAGTG)           |
| Cloning              | SR20f (ATGCATCGTGATTCCTGCC)                      |
|                      | SR20r (AAGGACATGTGGTGAAAACC)                     |
